# Supplementary figures and images for: Topographically grooved gel inserts for aligning epithelial cells during air–liquid-interface culture
Source: Royal Society of Chemistry journal article supplement (doi:10.1039/c4bm00237g), 2014-09-09

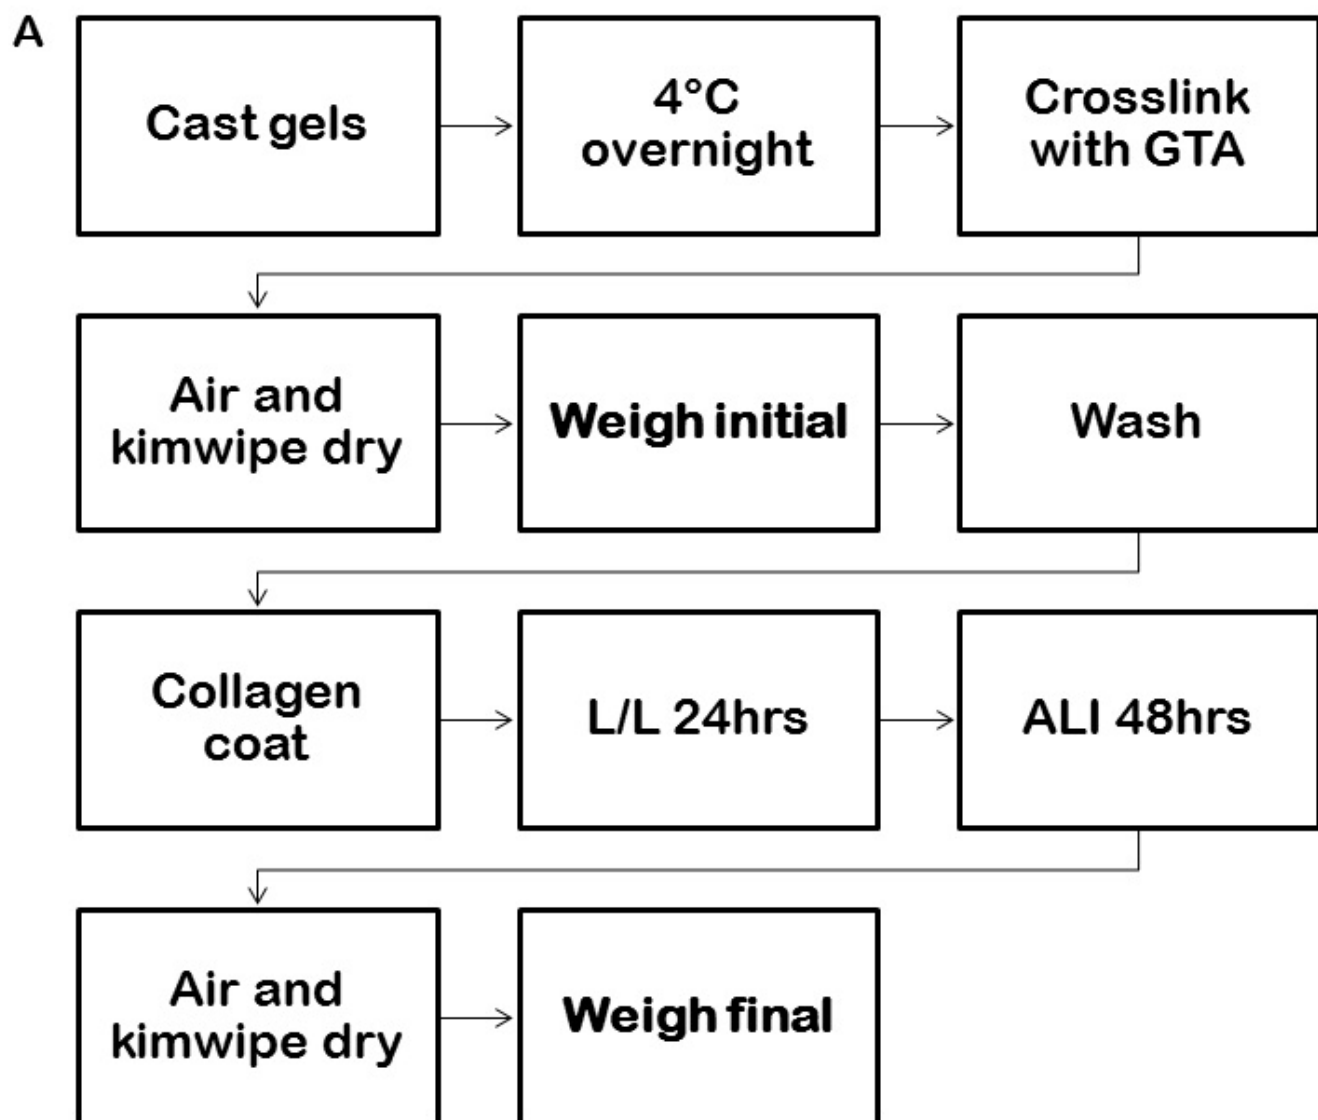

**B**

| Gelatin gel concentration (% w/w) | [GTA] (% v/v) | 0.1             | 0.25            | 0.5             |
|-----------------------------------|---------------|-----------------|-----------------|-----------------|
| 1.5                               |               |                 | -4.158 ± 0.181% | -4.763 ± 0.465% |
| 2                                 |               |                 | -5.771 ± 0.702% | -5.392 ± 0.822% |
| 3                                 |               | -6.891 ± 1.05%  | -5.907 ± 0.706% | -7.468 ± 0.537% |
| 5                                 |               | -4.247 ± 0.202% | -7.127 ± 0.435% | -7.129 ± 0.607% |
| 10                                |               | 0.225 ± 3.26%   | -5.226 ± 0.090% | -5.578 ± 0.129% |

Supplement: c4bm00237g2.pdf [file c4bm00237g2.pdf]
